# Supplementary material for: An Analysis of How Herpes Zoster Pain Affects Health-related Quality of Life of Placebo Patients From 3 Randomized Phase III Studies
Source: PubMed Central journal article supplement — Clin J Pain. 2023 May 11;39(8):386–93. doi: 10.1097/AJP.0000000000001129 (PMC10353534; doi:10.1097/ajp.0000000000001129), 2023-05-11
Supplement: ajp-39-386-s008.pdf [file ajp-39-386-s008.pdf]

# MODERATE AND SEVERE HZ PAIN HAD A SUBSTANTIAL IMPACT ON ALL ASPECTS OF HEALTH-RELATED QUALITY OF LIFE AND ACTIVITIES OF DAILY LIVING ACROSS AGE AND IMMUNOSUPPRESSION.

## THE STUDY

- \* Describes the impact of Herpes Zoster (HZ) pain on Health-related Quality of Life (HRQoL) and activities of daily living (ADL) in a non-vaccinated population (placebo groups) from three multinational phase III randomized trials.
- \* HZ pain and impact on ADL's assessed by the Zoster Brief Pain Inventory (ZBPI) questionnaire, completed daily for a minimum of 28 days from onset.
- \* HRQoL was assessed using two standard questionnaires, the Short Form Health Survey (SF-36) and the EuroQoL EQ-5D completed weekly from onset of HZ symptoms.

## SURVEYED POPULATION

Subjects who experienced a HZ episode in the placebo groups:

- Immunocompetent subjects  $\geq 50$  years of age (YOA)
- Autologous Hematopoietic Stem Cell Transplantation (HSCT) recipients  $\geq 18$  YOA

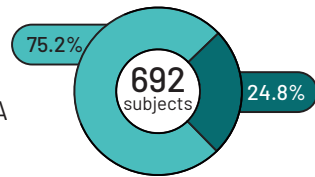

## RESULTS

### ZBPI score

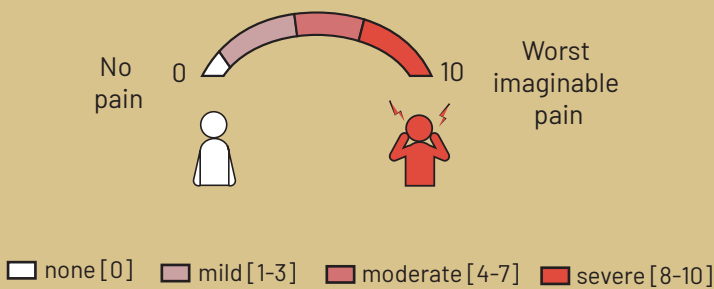

### Selected assessed domains

- ROLE PHYSICAL:** Scale assessing the difficulty of performing work or other usual activities as a result of physical problems.
- SOCIAL FUNCTIONING:** Scale assessing the impact of either physical or emotional problems on social activities.
- ROLE EMOTIONAL:** Scale assessing the impact on the ability to carry out work or activities of daily living due to emotional problems.
- PHYSICAL FUNCTIONING:** Scale assessing both severe and minor physical limitations.
- VITALITY:** Scale measuring general energy levels, and feelings of tiredness.

### Immunocompetent $\geq 50$ YOA

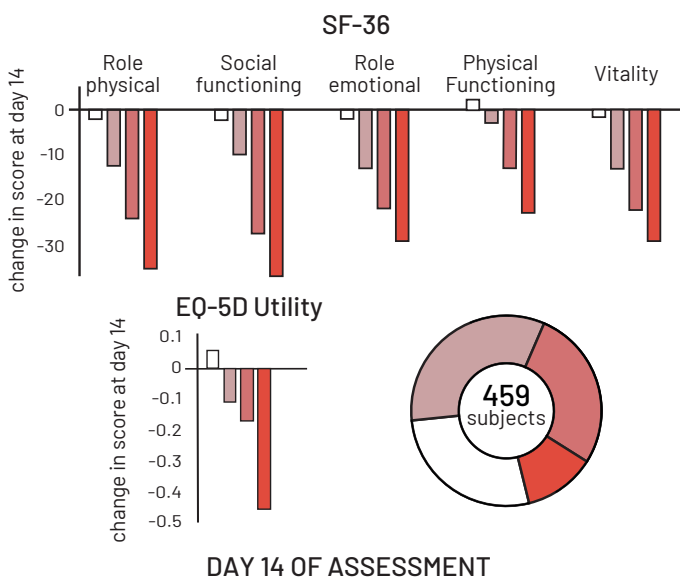

### HSCT $\geq 18$ YOA

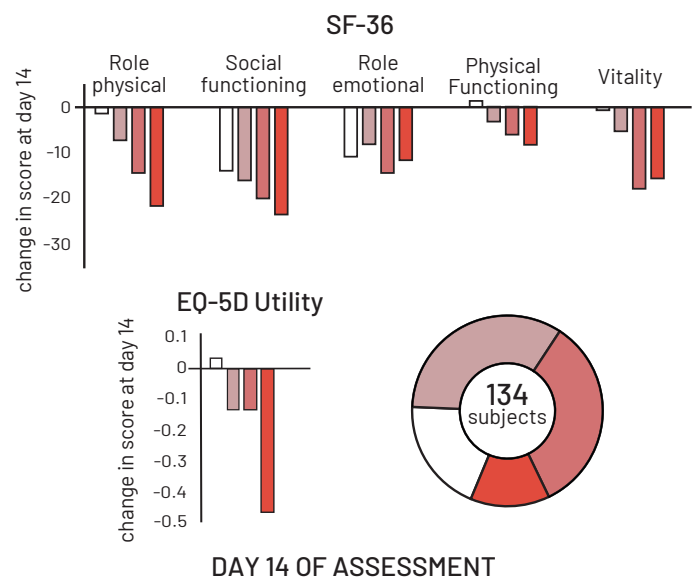

All SF-36 and EQ-5D domain scores show a significant relationship between increased HZ pain and worsening HRQoL. Our analysis also showed the impact of increasing HZ pain on ADL as measured by the ZBPI.

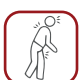

**AN ANALYSIS OF HOW HZ PAIN AFFECTS HEALTH RELATED QUALITY OF LIFE OF PLACEBO SUBJECTS FROM THREE RANDOMIZED PHASE III STUDIES.**
